# Supplementary material for: Deciphering transcriptome profiles of peripheral blood mononuclear cells in response to PRRSV vaccination in pigs
Source: BMC Genomics. 2016 Aug 15;17:641. doi: 10.1186/s12864-016-2849-1 (PMC4986384; doi:10.1186/s12864-016-2849-1)
Supplement: Additional file 3: — List of DEGs in PBMCs of pigs at 6 hpv of PRRSV vaccination in pigs compared to control. (XLSX 57 kb) [file 12864_2016_2849_MOESM3_ESM.xlsx]

## Sheet: DEGs_6 hpv
Transcript ID	Accession number	Symbol	Gene name	Entrez ID	log2 Fold change	P value	adjusted p value
15292099	AK345834	AAAS	achalasia, adrenocortical insufficiency, alacrimia	100154333	-1.77352	2.88683e-05	0.00196918
15298708	XM_003127603	AADACL4	arylacetamide deacetylase-like 4	100515144	2.02761	0.000184881	0.00562193
15327430	AAO17314	ABCB1	ATP-binding cassette, sub-family B (MDR/TAP), member 1	396910	-1.62376	2.70226e-05	0.00188936
15221881	XM_003132563	ABCC5	ATP-binding cassette, sub-family C (CFTR/MRP), member 5	100513626	1.63373	3.73224e-05	0.00238
15321760	AAS55905	ABCG2	ATP-binding cassette, sub-family G (WHITE), member 2	397073	-1.98015	0.000266519	0.00712792
15276609	ABO93311	ABCG8	ATP-binding cassette, sub-family G (WHITE), member 8	100048963	-2.08788	3.11474e-06	0.000725921
15199282	XM_005660524	ABL1	c-abl oncogene 1, non-receptor tyrosine kinase	100524544	-2.31794	2.65353e-05	0.00187538
15262344	AK395187	ACCSL	1-aminocyclopropane-1-carboxylate synthase homolog (Arabidopsis)(non-functional)-like	100521486	-1.51235	5.46806e-05	0.00289319
15207344	ABU51323	ACLY	ATP citrate lyase	100125957	2.07532	9.83171e-06	0.00110618
15243463	XM_003134106	ADAM19	ADAM metallopeptidase domain 19	100521528	1.64932	9.65846e-05	0.00399754
15311620	XM_001927556	ADCY4	adenylate cyclase 4	100152067	1.70715	6.27708e-06	0.000865397
15266703	XM_003123929	AFF4	AF4/FMR2 family, member 4	100524487	1.76736	1.22801e-05	0.00122986
15272796	XM_003481306	ALLC	allantoicase	100514832	1.66351	5.28235e-05	0.00282548
15281102	XM_003125791	ANKRD35	ankyrin repeat domain 35	100511691	1.54851	0.000295722	0.00758762
15226974	AK237305	ANXA11	annexin A11	100156481	3.01841	5.20193e-07	0.000540567
15232843	AK231264	AP3M1	adaptor-related protein complex 3, mu 1 subunit	100155017	1.62858	4.22936e-06	0.000774195
15316882	AK233495	AP3S2	adaptor-related protein complex 3, sigma 2 subunit	100153862	1.5064	3.87727e-05	0.00239162
15214779	AK238714	ARPP21	cAMP-regulated phosphoprotein, 21kDa	100512986	1.61548	0.000180329	0.00557711
15325159	AK235699	ARRB1	arrestin, beta 1	100521141	1.71902	4.94712e-06	0.000781046
15193369	XM_005659333	ASCC3	activating signal cointegrator 1 complex subunit 3	100517018	-1.92286	2.08805e-06	0.000616615
15297853	AK349187	ASPDH	aspartate dehydrogenase domain containing	100511638	1.67292	3.59932e-06	0.000759082
15265567	CBH40226	B4GALT7	xylosylprotein beta 1,4-galactosyltransferase, polypeptide 7	100316855	1.63083	2.48762e-06	0.000640792
15200817	AAS89066	BAMBI	BMP and activin membrane-bound inhibitor homolog (Xenopus laevis)	449001	1.88871	1.61393e-05	0.00144935
15273515	AK235960	BAZ1B	bromodomain adjacent to zinc finger domain, 1B	100625872	1.91797	0.00018968	0.0056658
15281438	AK233940	BCAS2	breast carcinoma amplified sequence 2	100154006	1.50934	3.79432e-05	0.00238031
15185743	XM_003121469	BNIP2	BCL2/adenovirus E1B 19kDa interacting protein 2	100521534	-1.84778	6.17003e-05	0.00309908
15246627	AAP40850	BPIFA2	BPI fold containing family A, member 2	396649	1.84643	2.88484e-05	0.00196918
15322402	XM_003356861	BST1	bone marrow stromal cell antigen 1	100625942	2.0512	5.98175e-06	0.000851671
15267938	AK348576	BUD31	BUD31 homolog (S. cerevisiae)	100520297	1.66351	5.28235e-05	0.00282548
15231642	XM_005670910	C14H22orf15	chromosome 14 open reading frame, human C22orf15	100512925	1.65023	1.55406e-05	0.00144935
15183193	XR_300598	C1H6orf118	chromosome 6 open reading frame 118, human C6orf118	100157121	1.87126	2.92675e-05	0.00198652
15184411	AK347103	C1H6orf162	uncharacterized protein C6orf162 ortholog	100154764	1.5109	0.000102341	0.00408882
15300366	XM_005653430	C6H1orf173	chromosome 6 open reading frame, human C1orf173	100514238	2.05777	0.000265457	0.00710925
15313045	XM_001925964	C7H14orf166B	chromosome 7 open reading frame, human C14orf166B	100153134	3.30817	5.01626e-06	0.000785627
15317165	XM_001928745	C7H15orf60	chromosome 7 open reading frame, human C15orf60	100154080	1.69542	0.000333158	0.00811224
15278710	AY610134	CA1	carbonic anhydrase I	100153915	1.97522	4.60319e-06	0.000774195
15255257	XM_003122907	CCDC34	coiled-coil domain containing 34	100518823	1.60276	0.000132457	0.0047118
15211288	XM_003131348	CCDC43	coiled-coil domain containing 43	100526134	-3.33282	8.81048e-05	0.00379918
15273607	AY610017	CCT6A	chaperonin containing TCP1, subunit 6A (zeta 1)	100520782	1.80189	0.000145022	0.00495478
15305237	XM_003127729	CD164L2	CD164 sialomucin-like 2	100512418	1.51131	1.8571e-05	0.00156795
15253978	XM_003122515	CD248	CD248 molecule, endosialin	100523587	-1.54504	4.36504e-05	0.00255811
15310257	XM_001925731	CD2AP	CD2-associated protein	100154585	2.71448	8.80506e-08	0.000475744
15293876	AK232080	CDCA3	cell division cycle associated 3	100153312	1.96089	6.11392e-05	0.00308485
15236673	XM_001928628	CDCA7	cell division cycle associated 7	100154583	1.59264	7.96505e-05	0.00358464
15243900	XM_005672398	CDH12	cadherin 12, type 2 (N-cadherin 2)	100523408	-3.7599	1.96126e-05	0.00162637
15226685	XM_001925683	CDH23	cadherin-related 23	100157198	1.63223	0.000189395	0.0056658
15265643	XM_003123669	CDHR2	cadherin-related family member 2	100525685	1.65981	0.000115057	0.00434969
15232391	AAR24392	CDK1	cyclin-dependent kinase 1	100155762	1.50936	0.000103631	0.00410662
15309380	AK232851	CDKN1A	cyclin-dependent kinase inhibitor 1A (p21, Cip1)	100152215	1.54114	6.55821e-06	0.000885449
15265263	XM_003123535	CERS1	ceramide synthase 1	100525450	1.69578	9.41754e-05	0.00393871
15266058	AAY67906	CETN3	centrin, EF-hand protein, 3	574052	1.60092	0.000112704	0.00429568
15195218	XM_005659753	CHAC1	ChaC, cation transport regulator homolog 1 (E. coli)	100524723	1.92967	8.58263e-06	0.00102453
15208108	XM_003358097	CHAD	chondroadherin	100624069	-3.13888	6.03334e-05	0.00305206
15310294	XM_001924570	CHRNA5	cholinergic receptor, nicotinic, alpha 5 (neuronal)	100156023	2.06331	9.69239e-07	0.000566918
15223003	XM_003132790	CKS2	CDC28 protein kinase regulatory subunit 2	100520933	2.17933	1.42213e-06	0.000568185
15317213	XM_005666193	CLEC14A	C-type lectin domain family 14, member A	100157365	2.00595	3.43527e-06	0.000759082
15204350	AK232461	CLYBL	citrate lyase beta like	100154139	2.03452	1.90188e-06	0.000616615
15267571	ABK55640	COX8H	COX8H protein	100038031	1.51973	6.29038e-05	0.00310193
15322891	AK350836	CPE	carboxypeptidase E	100037304	1.93014	4.23363e-07	0.000540567
15280677	ABI83737	CRNN	cornulin	100154709	1.95756	1.02193e-05	0.00112927
15322034	AK397525	CSN1S2	alpha(s2)-casein	445515	-2.57821	8.19218e-07	0.000540567
15247628	AK235656	CSTF1	cleavage stimulation factor, 3' pre-RNA, subunit 1, 50kDa	100126292	-1.76939	0.000106996	0.00418934
15227779	CAB07512	CYP2C42	cytochrome P450 C42	403111	1.58656	2.27696e-05	0.00174232
15300610	ABI33873	DAB1	disabled homolog 1 (Drosophila)	100037307	2.4432	4.60536e-07	0.000540567
15284321	AK351395	DCAF6	DDB1 and CUL4 associated factor 6	100514228	1.81614	4.76479e-05	0.00267628
15282381	AK236786	DDAH1	dimethylarginine dimethylaminohydrolase 1	100153814	2.5673	0.000192971	0.00572392
15264365	XM_003123318	DHPS	deoxyhypusine synthase	100519413	1.55098	1.93314e-05	0.0016142
15230320	ACJ24820	DIABLO	diablo, IAP-binding mitochondrial protein	100155744	2.2526	1.68451e-06	0.00061256
15325135	ADK36688	DNAJB13	DnaJ (Hsp40) homolog, subfamily B, member 13	100499566	1.63882	0.00011138	0.0042923
15223121	AK231458	DOK2	docking protein 2, 56kDa	100152025	1.53547	1.83565e-05	0.00156795
15195978	XM_001929097	DPP8	dipeptidyl-peptidase 8	100155833	1.50098	6.97723e-05	0.00332556
15306512	XM_003127951	EFCAB7	EF-hand calcium binding domain 7	100522325	3.16819	2.68468e-05	0.00188936
15291478	AK235304	EIF3L	eukaryotic translation initiation factor 3, subunit L	100515608	-2.05901	0.00015886	0.00518936
15244619	XM_005654221	ELOVL7	ELOVL fatty acid elongase 7	100524592	1.60506	3.83865e-06	0.000759082
15296087	XM_003126935	EXOC3L1	exocyst complex component 3-like 1	100522868	-2.5475	6.74751e-07	0.000540567
15209179	XM_003131818	FAM101B	family with sequence similarity 101, member B	100524216	1.8197	0.000411184	0.00932762
15243546	XM_003134127	FAM114A2	family with sequence similarity 114, member A2	100511051	2.12459	3.82573e-06	0.000759082
15191750	XM_003122343	FAM166A	family with sequence similarity 166, member A	100514750	2.59514	1.31489e-06	0.000568185
15254097	AAB52915	FAU	Finkel-Biskis-Reilly murine sarcoma virus (FBR-MuSV) ubiquitously expressed	396977	1.59284	0.000131423	0.00469501
15243531	XM_003134122	FAXDC2	fatty acid hydroxylase domain containing 2	100525263	1.53528	0.000377021	0.00883945
15318961	AK236302	FBLN5	fibulin 5	100155248	2.18555	4.37741e-05	0.00255811
15188287	EW053073	FBXO34	F-box protein 34	100511360	-2.25425	0.000103898	0.00410662
15216566	AK233033	FETUIN	FETUIN protein	397585	1.77943	1.02677e-05	0.00112927
15204757	AAS68524	FLT1	fms-related tyrosine kinase 1 (vascular endothelial growth factor/vascular permeability factor receptor)	396763	1.63719	0.000163498	0.00526446
15311340	XM_001929276	FOXA1	forkhead box A1	100156502	1.85531	8.7604e-05	0.00379856
15287570	AK352113	FOXRED2	FAD-dependent oxidoreductase domain containing 2	100513010	1.83279	0.000137775	0.00480789
15320970	AK398596	FRAS1	Fraser syndrome 1	100514970	1.89311	1.43036e-05	0.00137543
15300300	XM_003127917	FUBP1	far upstream element (FUSE) binding protein 1	100525995	1.7907	0.000220544	0.00621606
15226812	XM_001928248	FUT11	fucosyltransferase 11 (alpha (1,3) fucosyltransferase)	100157040	1.82813	2.08287e-06	0.000616615
15253989	XM_003122506	GAL3ST3	galactose-3-O-sulfotransferase 3	100522179	-1.68576	5.20681e-06	0.000796358
15246266	XM_005672774	GFRA4	GDNF family receptor alpha 4	100738405	1.82043	1.07781e-05	0.001141
15254585	AK231492	GIF	gastric intrinsic factor (vitamin B synthesis)	100514273	1.88915	1.61237e-05	0.00144935
15305673	XM_003356320	GJA9	gap junction protein, alpha 9, 59kDa	100626636	-2.63195	6.43957e-07	0.000540567
15309557	AEY77125	GLP1R	glucagon-like peptide 1 receptor	100154059	1.61802	7.57644e-05	0.00347144
15254656	XM_005660878	GLYATL2	glycine-N-acyltransferase-like 2	100525206	2.63039	9.27527e-06	0.00106619
15220015	AK344665	GMPPB	GDP-mannose pyrophosphorylase B	100513376	2.22964	0.00016531	0.00531208
15247759	ACY74742	GNAS	GNAS complex locus	100049657	1.73374	1.32116e-06	0.000568185
15204554	XM_003357908	GRK1	G protein-coupled receptor kinase 1	100620646	1.95549	4.41641e-07	0.000540567
15202255	AK232758	HABP4	hyaluronan binding protein 4	100512302	2.2498	2.52408e-05	0.00184597
15243543	AAX36030	HAND1	heart and neural crest derivatives expressed 1	541594	1.72018	3.02966e-05	0.0020382
15224656	XM_005657322	HECTD4	HECT domain containing E3 ubiquitin protein ligase 4	100151787	-1.78299	6.59655e-05	0.00321529
15305731	XM_003127826	HEYL	hairy/enhancer-of-split related with YRPW motif-like	100518256	2.32075	4.71033e-05	0.00267288
15192734	AY609473	HINT3	histidine triad nucleotide binding protein 3	100158022	1.62118	9.91679e-06	0.00110938
15251306	XM_003134841	HOXA4	homeobox A4	100519635	2.44317	2.13839e-06	0.000616615
15236737	XM_001925017	HOXD1	homeobox D1	100157662	2.00243	1.65382e-06	0.00061256
15236711	ACN32434	HOXD13	homeobox D13	100152793	1.65692	5.1763e-06	0.000796358
15236734	XM_003133499	HOXD3	homeobox D3	100515975	1.51504	0.000196889	0.00580498
15224107	AK232923	HPD	4-hydroxyphenylpyruvate dioxygenase	397443	1.81316	0.000118913	0.00440903
15316893	AAA31089	IDH2	isocitrate dehydrogenase 2 (NADP+), mitochondrial	397603	2.32675	4.58484e-06	0.000774195
15266654	AGN51950	IL-5	Interleukin 5	397409	1.61069	0.000273756	0.0072237
15246732	XM_005672869	ITCH	itchy E3 ubiquitin protein ligase	100519750	1.79127	8.71282e-05	0.00379046
15209765	XM_003131953	KCNAB3	potassium voltage-gated channel, shaker-related subfamily, beta member 3	100523637	-1.53229	5.84714e-05	0.00299886
15262817	XM_005661100	KCNC1	potassium voltage-gated channel, Shaw-related subfamily, member 1	100513908	1.8193	7.44763e-05	0.00343064
15313223	NM_001244596	KCNK13	potassium channel, subfamily K, member 13	100623906	1.72661	0.000440747	0.00968406
15184383	XM_003121265	KCNQ5	potassium voltage-gated channel, KQT-like subfamily, member 5	100154391	-2.16926	1.20279e-06	0.000568185
15289868	ACH71257	KDM5A	lysine (K)-specific demethylase 5A	100294704	1.82831	1.29072e-06	0.000568185
15255212	XM_003122903	KIF18A	kinesin family member 18A	100518110	1.98498	5.62433e-05	0.00292062
15287965	ABV48743	KRT18	keratin 18	100126286	1.76482	1.93886e-06	0.000616615
15196407	AK233783	L2HGDH	L-2-hydroxyglutarate dehydrogenase	100152180	1.67615	1.20097e-05	0.00121821
15322438	ADC38903	LCORL	ligand dependent nuclear receptor corepressor-like	100337668	1.98156	1.2519e-06	0.000568185
15276862	ABD94502	LOC100049694	ubiquitin-conjugating BIR-domain enzyme	100049694	1.91317	5.83775e-05	0.00299886
15314526	XM_005665723	LOC100152090	olfactory receptor 10C1-like	100152090	-1.57078	1.35701e-06	0.000568185
15231836	AK237539	LOC100152722	Chria protein	100152722	2.02516	9.96991e-05	0.00405976
15319570	XM_001927150	LOC100154182	olfactory receptor 4K5-like	100154182	1.84497	3.8141e-06	0.000759082
15247014	AK240065	LOC100154530	tissue transglutaminase homologue; TGH2	100154530	1.70223	0.000306418	0.007752
15226939	AY610410	LOC100155012	40S ribosomal protein S24-like	100155012	1.92614	6.14004e-06	0.000852508
15191630	XM_001926130	LOC100155372	olfactory receptor 8K3-like	100155372	2.10469	0.000353152	0.0084519
15319568	XM_001927140	LOC100155405	olfactory receptor 4K1-like	100155405	1.84688	4.2941e-05	0.00254062
15214669	XM_003358338	LOC100156011	glutaredoxin-1-like	100156011	1.86392	0.00041482	0.00937751
15233827	AK231019	LOC100156375	COX15 homolog, cytochrome c oxidase assembly protein	100156375	2.29281	1.07823e-05	0.001141
15314554	XM_001928364	LOC100156511	olfactory receptor 2B11-like	100156511	-1.79016	3.46114e-05	0.00223626
15312228	XM_003480699	LOC100157508	olfactory receptor 4K13-like	100157508	1.7982	5.98784e-06	0.000851671
15312222	XM_001927921	LOC100157950	olfactory receptor 4F4-like	100157950	1.68412	7.20456e-06	0.000921854
15260188	XM_003124154	LOC100512461	olfactory receptor 140-like	100512461	1.83081	9.99157e-05	0.00405976
15195443	XM_003353413	LOC100514264	putative RNA-binding protein 3-like	100514264	-1.77058	0.000304509	0.00773201
15260406	AK232567	LOC100515296	solute carrier family 22 member 18-like	100515296	-2.00914	1.07212e-05	0.001141
15270020	XM_005662271	LOC100515432	zinc finger protein 169-like	100515432	1.63083	2.48762e-06	0.000640792
15270022	XM_005662271	LOC100515432	zinc finger protein 169-like	100515432	1.58335	6.94999e-05	0.00332556
15196042	XM_005659863	LOC100515463	multiple epidermal growth factor-like domains protein 11-like	100515463	3.41922	8.55983e-07	0.000540567
15314493	XM_003128247	LOC100515554	olfactory receptor 12D2-like	100515554	-1.78966	1.6121e-05	0.00144935
15254639	XM_003122691	LOC100515876	olfactory receptor 5AN1-like	100515876	1.5728	6.17511e-05	0.00309908
15213771	XM_005669181	LOC100516108	proline-, glutamic acid- and leucine-rich protein 1-like	100516108	1.71544	0.000141675	0.00489853
15313733	XM_003128583	LOC100516208	olfactory receptor 4F15-like	100516208	-1.66873	0.000317616	0.00791091
15316967	AK399674	LOC100516480	cytochrome c oxidase subunit 7B, mitochondrial-like	100516480	2.16337	3.88484e-05	0.00239162
15216727	XM_003132408	LOC100517496	dnaJ homolog subfamily B member 8-like	100517496	1.75916	0.000112435	0.00429568
15254732	XM_003122775	LOC100517996	olfactory receptor 5AK2-like	100517996	1.97702	2.84113e-05	0.00195161
15264735	XM_003123381	LOC100518060	olfactory receptor 7A17-like	100518060	1.63098	0.000172262	0.00540607
15312200	XM_003356723	LOC100518135	olfactory receptor 4F21-like	100518135	1.77903	8.91431e-05	0.00381038
15324763	XM_003129400	LOC100521207	olfactory receptor 491-like	100521207	1.58699	8.17158e-05	0.00363185
15259097	XM_003123852	LOC100521657	aminopeptidase Q-like	100521657	1.73215	2.76823e-06	0.000685996
15302307	XM_003127002	LOC100522678	cytochrome b-c1 complex subunit Rieske, mitochondrial-like	100522678	1.72848	2.35722e-05	0.0017749
15261960	XM_003122788	LOC100523167	olfactory receptor 4X2-like	100523167	-1.97413	1.76334e-05	0.00152747
15327212	XM_005667625	LOC100523505	cytoplasmic dynein 1 intermediate chain 1-like	100523505	1.56933	9.38873e-05	0.00393871
15254744	XM_003122794	LOC100524237	olfactory receptor 4S2-like	100524237	1.50576	1.6623e-05	0.00146927
15320689	XM_005666714	LOC100524323	circadian locomoter output cycles protein kaput-like	100524323	1.87112	5.54929e-05	0.00290477
15250639	NA	LOC100524410	sorting nexin 5 pseudogene	100524410	-2.55305	7.14912e-06	0.000920778
15190460	XM_003122135	LOC100525147	olfactory receptor 1J4-like	100525147	1.82842	0.000179531	0.00556797
15191798	XM_003353646	LOC100621729	olfactory receptor 1L8-like	100621729	1.5007	0.000227555	0.00635379
15249422	XM_005672933	LOC100622320	ral GTPase-activating protein subunit beta-like	100622320	-1.96949	3.93082e-05	0.00241234
15321991	AY609668	LOC100623758	uncharacterized LOC100623758	100623758	-2.44467	0.000379243	0.00887006
15209911	XM_003358296	LOC100624731	uncharacterized LOC100624731	100624731	1.63968	9.93911e-05	0.00405976
15265949	XM_005661518	LOC100624840	spermatogenic leucine zipper protein 1-like	100624840	1.5152	0.000257532	0.00695408
15219646	XM_005669483	LOC100737041	uncharacterized LOC100737041	100737041	1.5314	0.000428789	0.00951746
15242008	XM_005666052	LOC100737129	GTP-binding protein 2-like	100737129	1.64656	7.13028e-06	0.000920778
15265937	XR_135144	LOC100737503	thrombospondin-4-like	100737503	2.18198	3.0019e-06	0.000725921
15316906	XM_005653530	LOC100738227	40S ribosomal protein S29-like	100738227	2.52264	1.67784e-05	0.00146927
15284502	XR_303065	LOC100738562	uncharacterized LOC100738562	100738562	1.6585	2.32902e-05	0.00176043
15197022	XM_005660068	LOC100739402	kelch-like protein 9-like	100739402	1.69578	6.6676e-06	0.000890523
15260164	XM_003480960	LOC100739499	olfactory receptor 8K3-like	100739499	2.16759	4.4114e-06	0.000774195
15204989	XR_306145	LOC100739796	NHL repeat-containing protein 3-like	100739796	1.50697	8.20038e-05	0.00363185
15315594	AAZ81949	LOC654299	transcription enhancer factor 5	654299	2.35692	3.359e-05	0.00217962
15300356	ABF72038	LOC733653	crystallin, zeta (quinone reductase)	733653	1.9886	0.000285813	0.00742168
15263486	AK232538	LONP1	lon peptidase 1, mitochondrial	100511917	1.51841	8.23692e-05	0.00363185
15249446	ACA51852	LPIN3	lipin 3	100170771	-2.07606	1.65514e-06	0.00061256
15286875	XM_005663704	LRRC8B	leucine rich repeat containing 8 family, member B	100155627	3.94353	0.000104951	0.00413406
15200821	XM_003130701	LYZL1	lysozyme-like 1	100517051	1.50504	2.07758e-05	0.00166021
15300700	AK399749	MAGOH	mago-nashi homolog, proliferation-associated (Drosophila)	100519318	1.69452	0.000115091	0.00434969
15264335	AK239666	MAN2B1	mannosidase, alpha, class 2B, member 1	100518647	1.64763	2.40637e-06	0.000640792
15321615	XM_003129293	MANBA	mannosidase, beta A, lysosomal	100524326	1.67725	0.000222764	0.00626588
15318346	XM_001925646	MAP3K9	mitogen-activated protein kinase kinase kinase 9	100155753	1.83818	2.19069e-06	0.000616615
15266044	A4UTP7	MEF2C	myocyte enhancer factor 2C	733590	1.85921	8.78965e-05	0.00379856
15313716	NR_038562	MIR127	microRNA mir-127	100498735	1.70086	2.60683e-05	0.00187538
15202160	NR_038534	MIR181B-1	microRNA mir-181b-1	100498784	-1.72067	6.73032e-05	0.00326137
15211534	AK235335	MLX	MLX, MAX dimerization protein	100519270	2.08259	1.56341e-05	0.00144935
15237154	AAX68443	MOBKL3	MOB family member 4, phocein	613127	1.87865	0.00019096	0.00567286
15317041	AK231085	MPI	mannose phosphate isomerase	100154551	1.59975	1.21174e-05	0.00122279
15210490	XM_003131188	MRPL38	mitochondrial ribosomal protein L38	100520633	-1.84447	0.000200779	0.00589301
15205015	AK236064	MRPS31	mitochondrial ribosomal protein S31	100153860	1.66049	1.46086e-05	0.00138161
15240515	AAB86690	MSTN	myostatin	399534	1.96502	7.35826e-05	0.00341357
15222197	ABY53612	MUC20	mucin 20, cell surface associated	100134954	2.06218	1.97628e-07	0.000514926
15268710	AAV28622	MYLPF	myosin light chain, phosphorylatable, fast skeletal muscle	474162	-1.98844	0.000168689	0.00536109
15226780	AAY78933	MYOZ1	myozenin 1	574060	1.56076	0.000144009	0.00494609
15181751	NA	NA	NA	NA	2.60158	6.0177e-08	0.000475744
15204583	NA	NA	NA	NA	2.40967	1.28342e-07	0.000475744
15182271	NA	NA	NA	NA	2.5487	1.45807e-07	0.000475744
15181181	NA	NA	NA	NA	2.31745	2.89329e-07	0.000514926
15254100	NA	NA	NA	NA	2.55617	3.32893e-07	0.000540567
15222762	NA	NA	NA	NA	2.34179	4.69273e-07	0.000540567
15305684	NA	NA	NA	NA	-2.63195	6.43957e-07	0.000540567
15254746	NA	NA	NA	NA	2.55121	6.52237e-07	0.000540567
15180773	NA	NA	NA	NA	2.17262	6.81416e-07	0.000540567
15270278	NA	NA	NA	NA	2.06119	7.23252e-07	0.000540567
15222774	NA	NA	NA	NA	2.26004	8.42838e-07	0.000540567
15208088	NA	NA	NA	NA	2.50206	8.50334e-07	0.000540567
15287257	NA	NA	NA	NA	1.98339	9.84585e-07	0.000566918
15276716	NA	NA	NA	NA	2.11651	1.02483e-06	0.000568185
15189447	NA	NA	NA	NA	2.0314	1.18491e-06	0.000568185
15247028	NA	NA	NA	NA	1.73337	1.28603e-06	0.000568185
15284463	NA	NA	NA	NA	1.99493	1.39549e-06	0.000568185
15260314	NA	NA	NA	NA	1.73842	1.70482e-06	0.00061256
15318101	NA	NA	NA	NA	2.09	1.72506e-06	0.00061256
15199875	NA	NA	NA	NA	1.84023	1.75223e-06	0.00061256
15306510	NA	NA	NA	NA	1.86524	1.80493e-06	0.000615765
15230461	NA	NA	NA	NA	-2.39672	1.97513e-06	0.000616615
15254748	NA	NA	NA	NA	2.07939	1.97575e-06	0.000616615
15316608	NA	NA	NA	NA	2.32169	2.11602e-06	0.000616615
15209760	NA	NA	NA	NA	-2.06562	2.14719e-06	0.000616615
15306556	NA	NA	NA	NA	2.2121	2.22574e-06	0.000616615
15254084	NA	NA	NA	NA	2.0394	2.44272e-06	0.000640792
15255355	NA	NA	NA	NA	-1.87255	2.59706e-06	0.000660293
15180237	NA	NA	NA	NA	2.53253	3.06853e-06	0.000725921
15322296	NA	NA	NA	NA	1.83214	3.07814e-06	0.000725921
15260424	NA	NA	NA	NA	-2.13615	3.25686e-06	0.000750111
15279735	NA	NA	NA	NA	1.67547	3.43084e-06	0.000759082
15265767	NA	NA	NA	NA	-1.69835	3.49057e-06	0.000759082
15208017	NA	NA	NA	NA	1.66276	3.60058e-06	0.000759082
15322285	NA	NA	NA	NA	2.01109	3.82068e-06	0.000759082
15180515	NA	NA	NA	NA	2.07474	3.82808e-06	0.000759082
15287567	NA	NA	NA	NA	-2.45869	3.88162e-06	0.000759234
15259374	NA	NA	NA	NA	2.43772	4.07655e-06	0.000774195
15222315	NA	NA	NA	NA	1.70556	4.21407e-06	0.000774195
15202440	NA	NA	NA	NA	1.6853	4.33567e-06	0.000774195
15274005	NA	NA	NA	NA	2.27451	4.75394e-06	0.000774195
15216982	NA	NA	NA	NA	2.65457	4.76315e-06	0.000774195
15259714	NA	NA	NA	NA	1.73007	4.77491e-06	0.000774195
15324201	NA	NA	NA	NA	-2.30619	4.80107e-06	0.000774195
15326843	NA	NA	NA	NA	-2.30619	4.80107e-06	0.000774195
15254048	NA	NA	NA	NA	2.05837	4.84615e-06	0.000774195
15222918	NA	NA	NA	NA	1.91691	4.84948e-06	0.000774195
15254698	NA	NA	NA	NA	1.87063	4.86417e-06	0.000774195
15275492	NA	NA	NA	NA	1.66166	5.06718e-06	0.000787303
15223933	NA	NA	NA	NA	1.56427	5.3792e-06	0.000810067
15254095	NA	NA	NA	NA	1.95049	5.44236e-06	0.000813139
15311081	NA	NA	NA	NA	1.80453	5.48268e-06	0.000813139
15244644	NA	NA	NA	NA	2.52407	5.79294e-06	0.000848406
15282571	NA	NA	NA	NA	1.8283	5.85048e-06	0.000848406
15180599	NA	NA	NA	NA	2.37569	6.00747e-06	0.000851671
15221592	NA	NA	NA	NA	1.7689	6.04701e-06	0.000851671
15312230	NA	NA	NA	NA	2.17523	6.11844e-06	0.000852508
15193885	NA	NA	NA	NA	1.82701	6.50221e-06	0.000884289
15182395	NA	NA	NA	NA	-3.15846	6.68677e-06	0.000890523
15182483	NA	NA	NA	NA	2.32133	6.85375e-06	0.000906594
15316614	NA	NA	NA	NA	2.08351	6.94232e-06	0.000912147
15180139	NA	NA	NA	NA	2.4504	7.01254e-06	0.00091523
15278202	NA	NA	NA	NA	2.79438	7.31902e-06	0.000930418
15269913	NA	NA	NA	NA	1.62184	7.55355e-06	0.000954038
15275933	NA	NA	NA	NA	3.08669	7.76908e-06	0.00097497
15319684	NA	NA	NA	NA	1.56593	7.87136e-06	0.000981514
15259717	NA	NA	NA	NA	2.01263	8.13933e-06	0.000995898
15199742	NA	NA	NA	NA	1.6511	8.23198e-06	0.00100098
15187824	NA	NA	NA	NA	1.56433	8.72166e-06	0.00103481
15195266	NA	NA	NA	NA	1.55707	8.9769e-06	0.00105868
15182209	NA	NA	NA	NA	1.78441	9.20229e-06	0.00106619
15205309	NA	NA	NA	NA	1.61487	9.24999e-06	0.00106619
15192850	NA	NA	NA	NA	1.723	9.36736e-06	0.00106619
15204023	NA	NA	NA	NA	1.8179	1.00748e-05	0.00112065
15180269	NA	NA	NA	NA	2.35037	1.0655e-05	0.001141
15180273	NA	NA	NA	NA	2.35037	1.0655e-05	0.001141
15198615	NA	NA	NA	NA	1.82812	1.12929e-05	0.00118226
15296733	NA	NA	NA	NA	1.75532	1.14277e-05	0.00118547
15222578	NA	NA	NA	NA	1.74009	1.14447e-05	0.00118547
15181313	NA	NA	NA	NA	-1.91759	1.18602e-05	0.00121118
15181351	NA	NA	NA	NA	1.62988	1.23759e-05	0.00122986
15182177	NA	NA	NA	NA	1.6569	1.36682e-05	0.00132467
15326983	NA	NA	NA	NA	-3.20508	1.44983e-05	0.00137855
15283009	NA	NA	NA	NA	1.61134	1.50863e-05	0.00141993
15209485	NA	NA	NA	NA	-2.11671	1.5948e-05	0.00144935
15182195	NA	NA	NA	NA	1.62269	1.59948e-05	0.00144935
15211892	NA	NA	NA	NA	2.08152	1.63033e-05	0.00145739
15229240	NA	NA	NA	NA	-2.34606	1.83188e-05	0.00156795
15189936	NA	NA	NA	NA	1.74374	1.85481e-05	0.00156795
15192561	NA	NA	NA	NA	2.92394	1.85813e-05	0.00156795
15182701	NA	NA	NA	NA	2.17453	1.93767e-05	0.0016142
15185770	NA	NA	NA	NA	1.71971	2.03332e-05	0.00165319
15322433	NA	NA	NA	NA	1.77472	2.03514e-05	0.00165319
15180931	NA	NA	NA	NA	1.79502	2.06714e-05	0.00166021
15180081	NA	NA	NA	NA	1.79433	2.0777e-05	0.00166021
15209480	NA	NA	NA	NA	2.46219	2.11505e-05	0.00168203
15180173	NA	NA	NA	NA	2.07537	2.12219e-05	0.00168203
15184942	NA	NA	NA	NA	-2.55364	2.15897e-05	0.00168957
15244646	NA	NA	NA	NA	2.25141	2.16303e-05	0.00168957
15244268	NA	NA	NA	NA	-2.30682	2.17485e-05	0.00168957
15180367	NA	NA	NA	NA	1.95954	2.25634e-05	0.00174051
15215191	NA	NA	NA	NA	1.71027	2.27836e-05	0.00174232
15195077	NA	NA	NA	NA	-2.31794	2.65353e-05	0.00187538
15199873	NA	NA	NA	NA	1.52517	2.78121e-05	0.00193052
15326472	NA	NA	NA	NA	-1.56884	2.7907e-05	0.00193052
15182335	NA	NA	NA	NA	1.53514	3.10691e-05	0.0020797
15228638	NA	NA	NA	NA	-1.81908	3.35029e-05	0.00217962
15180303	NA	NA	NA	NA	1.85579	3.36235e-05	0.00217962
15298994	NA	NA	NA	NA	1.65221	3.6859e-05	0.00236586
15297234	NA	NA	NA	NA	-2.301	3.80567e-05	0.00238031
15324378	NA	NA	NA	NA	1.93819	3.86182e-05	0.00239162
15242268	NA	NA	NA	NA	-1.98749	3.8673e-05	0.00239162
15202267	NA	NA	NA	NA	1.7778	3.99556e-05	0.00242495
15182079	NA	NA	NA	NA	-1.68661	4.01526e-05	0.00242495
15220823	NA	NA	NA	NA	3.36199	4.02038e-05	0.00242495
15276701	NA	NA	NA	NA	1.81232	4.03388e-05	0.00242495
15181347	NA	NA	NA	NA	2.32961	4.29558e-05	0.00254062
15274996	NA	NA	NA	NA	-1.77713	4.37039e-05	0.00255811
15180545	NA	NA	NA	NA	1.8807	4.40145e-05	0.00256016
15273992	NA	NA	NA	NA	1.82262	4.4692e-05	0.00257112
15293092	NA	NA	NA	NA	1.58861	4.57707e-05	0.0026124
15263026	NA	NA	NA	NA	1.57515	4.78004e-05	0.00267628
15208373	NA	NA	NA	NA	1.61502	4.88426e-05	0.00270111
15182771	NA	NA	NA	NA	1.54887	4.89974e-05	0.00270203
15321601	NA	NA	NA	NA	1.58745	4.94434e-05	0.00271897
15254098	NA	NA	NA	NA	2.34693	5.16399e-05	0.00279437
15182247	NA	NA	NA	NA	1.52944	5.48693e-05	0.00289535
15180737	NA	NA	NA	NA	-2.41836	5.52457e-05	0.00290477
15221783	NA	NA	NA	NA	2.19649	5.56825e-05	0.00290692
15196178	NA	NA	NA	NA	-2.61316	5.77357e-05	0.0029888
15265519	NA	NA	NA	NA	1.62531	5.78615e-05	0.0029888
15229703	NA	NA	NA	NA	-2.42003	6.18961e-05	0.00309908
15274612	NA	NA	NA	NA	-1.86278	6.79419e-05	0.00327611
15182379	NA	NA	NA	NA	1.97475	6.9111e-05	0.00331614
15181151	NA	NA	NA	NA	-2.15935	6.98168e-05	0.00332556
15182735	NA	NA	NA	NA	2.93898	7.20137e-05	0.00339257
15181433	NA	NA	NA	NA	-1.50642	7.31335e-05	0.0034008
15180561	NA	NA	NA	NA	1.71737	7.60495e-05	0.00347144
15214728	NA	NA	NA	NA	1.6059	7.60713e-05	0.00347144
15301792	NA	NA	NA	NA	-1.8458	8.16658e-05	0.00363185
15180123	NA	NA	NA	NA	1.86459	8.22186e-05	0.00363185
15276729	NA	NA	NA	NA	1.6048	8.42147e-05	0.00368007
15257006	NA	NA	NA	NA	-1.99625	8.6116e-05	0.00375477
15254099	NA	NA	NA	NA	2.96558	8.8657e-05	0.00380622
15182239	NA	NA	NA	NA	2.68448	8.91107e-05	0.00381038
15190327	NA	NA	NA	NA	1.77855	9.06558e-05	0.00384149
15216950	NA	NA	NA	NA	1.67279	9.27845e-05	0.00391475
15281028	NA	NA	NA	NA	-1.81624	9.98431e-05	0.00405976
15315785	NA	NA	NA	NA	-1.94212	0.000100213	0.00405976
15294316	NA	NA	NA	NA	1.87525	0.000100369	0.00405976
15181097	NA	NA	NA	NA	1.68308	0.00010178	0.00408882
15181405	NA	NA	NA	NA	1.5109	0.000102341	0.00408882
15209183	NA	NA	NA	NA	1.5071	0.000113004	0.00429568
15308907	NA	NA	NA	NA	1.53616	0.000116843	0.0043891
15251362	NA	NA	NA	NA	1.83332	0.000117031	0.0043891
15226206	NA	NA	NA	NA	1.51147	0.000118258	0.00440443
15317982	NA	NA	NA	NA	2.10873	0.000120137	0.00443758
15299535	NA	NA	NA	NA	1.7766	0.000122737	0.00450056
15264302	NA	NA	NA	NA	1.80881	0.000125065	0.00457126
15181111	NA	NA	NA	NA	1.90436	0.000125681	0.00457126
15262889	NA	NA	NA	NA	2.48179	0.000126091	0.00457126
15283528	NA	NA	NA	NA	-1.5609	0.000128099	0.00460993
15303061	NA	NA	NA	NA	-1.87903	0.000132411	0.0047118
15268034	NA	NA	NA	NA	1.60137	0.00013414	0.00474876
15197351	NA	NA	NA	NA	1.61165	0.000135189	0.00476008
15278708	NA	NA	NA	NA	1.99677	0.000140854	0.00488054
15220361	NA	NA	NA	NA	1.50082	0.000141874	0.00489853
15210890	NA	NA	NA	NA	1.86725	0.000144662	0.00495452
15291444	NA	NA	NA	NA	2.38037	0.000147501	0.00501325
15287893	NA	NA	NA	NA	1.82567	0.000147814	0.00501519
15190025	NA	NA	NA	NA	-2.50863	0.000150749	0.00507781
15254394	NA	NA	NA	NA	1.86076	0.000156587	0.00518936
15247497	NA	NA	NA	NA	1.50537	0.000157924	0.00518936
15264186	NA	NA	NA	NA	1.74153	0.00015931	0.00518936
15216712	NA	NA	NA	NA	1.58812	0.000166875	0.00532938
15220601	NA	NA	NA	NA	1.65519	0.000171234	0.00540607
15180581	NA	NA	NA	NA	1.50943	0.000171458	0.00540607
15181675	NA	NA	NA	NA	1.64459	0.000174644	0.00544427
15202128	NA	NA	NA	NA	-1.93024	0.000181079	0.00559146
15245958	NA	NA	NA	NA	-2.58495	0.000181418	0.00559171
15230468	NA	NA	NA	NA	1.66622	0.000183667	0.00562193
15189663	NA	NA	NA	NA	1.71808	0.000184834	0.00562193
15213200	NA	NA	NA	NA	1.64198	0.00018499	0.00562193
15322863	NA	NA	NA	NA	1.56102	0.000195643	0.00578566
15182675	NA	NA	NA	NA	1.85515	0.000206517	0.00599849
15182077	NA	NA	NA	NA	1.81633	0.000211745	0.0060907
15181407	NA	NA	NA	NA	1.51033	0.000217792	0.00617036
15204360	NA	NA	NA	NA	1.95703	0.000220178	0.00621606
15189410	NA	NA	NA	NA	1.62625	0.000225503	0.00632476
15323960	NA	NA	NA	NA	-1.90839	0.000227284	0.00635379
15317755	NA	NA	NA	NA	1.77021	0.00024054	0.00660858
15237746	NA	NA	NA	NA	-1.89387	0.000245721	0.00669052
15230464	NA	NA	NA	NA	1.76728	0.000247299	0.00671481
15213767	NA	NA	NA	NA	1.55429	0.000257491	0.00695408
15204334	NA	NA	NA	NA	1.74583	0.000260571	0.00701372
15278813	NA	NA	NA	NA	-2.74764	0.000260816	0.00701372
15259647	NA	NA	NA	NA	1.59965	0.000268994	0.00715503
15210761	NA	NA	NA	NA	2.07483	0.000279193	0.00731695
15190585	NA	NA	NA	NA	1.52537	0.00028312	0.00738036
15265018	NA	NA	NA	NA	-1.52931	0.000286463	0.00742168
15277376	NA	NA	NA	NA	3.17812	0.000286601	0.00742168
15259259	NA	NA	NA	NA	2.40886	0.000309488	0.00779775
15180047	NA	NA	NA	NA	1.63524	0.000310842	0.0078218
15243184	NA	NA	NA	NA	-2.25138	0.000316345	0.00788929
15249444	NA	NA	NA	NA	-2.25939	0.00031884	0.00792123
15267851	NA	NA	NA	NA	1.74636	0.000368951	0.00870236
15272858	NA	NA	NA	NA	1.74636	0.000368951	0.00870236
15247491	NA	NA	NA	NA	1.54626	0.000379686	0.00887006
15307471	NA	NA	NA	NA	-1.76489	0.000385691	0.0089889
15182659	NA	NA	NA	NA	1.64688	0.0003883	0.00901749
15180667	NA	NA	NA	NA	1.91373	0.000393828	0.00911343
15238399	NA	NA	NA	NA	2.04165	0.00039614	0.00912381
15264746	NA	NA	NA	NA	1.77151	0.00041391	0.00936776
15327718	NA	NA	NA	NA	1.56569	0.000417509	0.00941656
15259632	NA	NA	NA	NA	1.56092	0.000437999	0.00965292
15202184	NA	NA	NA	NA	1.91633	0.000442602	0.00971339
15254049	NA	NA	NA	NA	2.30294	0.000445673	0.00975402
15262886	NA	NA	NA	NA	1.90499	0.000448303	0.00976243
15249029	NA	NA	NA	NA	-1.86959	0.000453391	0.00986034
15180583	NA	NA	NA	NA	1.84354	0.000453806	0.00986034
15236740	AK231013	NFE2L2	nuclear factor (erythroid-derived 2)-like 2	100516343	-1.77921	8.0225e-06	0.000990125
15311362	XM_001925340	NKX2-8	NK2 homeobox 8	100155618	1.75669	1.57352e-05	0.00144935
15243710	AK349096	NSUN2	NOP2/Sun RNA methyltransferase family, member 2	100518405	-1.52214	7.26664e-05	0.0033952
15234114	L10124	NT5C2	5'-nucleotidase, cytosolic II	100154612	2.18733	9.68532e-07	0.000566918
15284433	AK231131	NUF2	NUF2, NDC80 kinetochore complex component	100152590	1.8058	9.45454e-05	0.00393871
15317998	XM_003356728	NUTM1	NUT midline carcinoma, family member 1	100154145	-2.71158	1.45058e-05	0.00137855
15261402	ACA09613	OTUB1	OTU domain, ubiquitin aldehyde binding 1	100302092	-2.40883	1.6593e-05	0.00146927
15313370	XM_001925368	OTUB2	OTU domain, ubiquitin aldehyde binding 2	100151873	1.96879	3.66593e-06	0.000759082
15233395	XM_001926022	PANK1	pantothenate kinase 1	100154650	1.6146	8.39315e-06	0.00101428
15227530	XM_003133143	PCGF5	polycomb group ring finger 5	100522283	1.85653	4.3424e-06	0.000774195
15321406	AAP31238	PDE5	phosphodiesterase isozyme 5	397616	2.15021	7.14002e-07	0.000540567
15236613	AK231346	PDK1	pyruvate dehydrogenase kinase, isozyme 1	100286871	1.77838	9.77118e-06	0.00110573
15231339	AK232087	PES1	pescadillo ribosomal biogenesis factor 1	100154050	2.28453	2.78942e-07	0.000514926
15283389	AK349998	PGCP	plasma glutamate carboxypeptidase	100157979	1.68348	5.10936e-05	0.0027785
15307663	XM_005665575	PHACTR1	phosphatase and actin regulator 1	100153737	1.91585	0.00028877	0.00746796
15189421	XM_003353561	PIGO	phosphatidylinositol glycan anchor biosynthesis, class O	100624832	2.00878	2.23628e-06	0.000616615
15188495	ACF74527	PKC	protein kinase C theta	100152637	2.15343	5.37894e-06	0.000810067
15231401	AK348181	PLA2G3	phospholipase A2, group III	100511161	1.52127	1.66753e-05	0.00146927
15183244	ABF82358	PLG	plasminogen	733660	2.05918	2.43467e-05	0.0018123
15221523	XM_003132464	PLSCR4	phospholipid scramblase 4	100518400	1.82481	2.71355e-05	0.0018905
15317126	AK349512	PML	promyelocytic leukemia	100157336	1.8294	2.47395e-07	0.000514926
15191334	XM_003122249	POMT1	protein-O-mannosyltransferase 1	100525803	1.97451	4.73215e-05	0.00267628
15260089	ACL36049	PPARGC1B	peroxisome proliferator-activated receptor gamma, coactivator 1 beta	100329221	1.75133	5.61037e-05	0.00292062
15253026	XM_003134803	PPP1R17	protein phosphatase 1, regulatory subunit 17	100511608	1.64313	0.000228161	0.00635379
15235937	AAA30982	PPP2CB	protein phosphatase 2, catalytic subunit, beta isozyme	397136	1.6217	3.17832e-05	0.00210209
15188588	AK347219	PPP2R5E	protein phosphatase 2, regulatory subunit B', epsilon isoform	100525377	1.77839	8.04157e-06	0.000990125
15244667	AET99221	PPWD1	peptidylprolyl isomerase domain and WD repeat containing 1	100512505	1.62946	3.42863e-06	0.000759082
15324652	XM_003129364	PRKG2	protein kinase, cGMP-dependent, type II	100512796	-1.62376	2.70226e-05	0.00188936
15287772	XM_003126105	PRPH	peripherin	100152434	1.52744	0.000431602	0.00954743
15247339	AK238090	PTI	pancreatic trypsin inhibitor	100156830	-1.62744	1.23382e-05	0.00122986
15256585	AK348825	RAB11B	RAB11B, member RAS oncogene family	100513782	1.78658	0.000328814	0.00806481
15208954	ABI97176	RAB34	RAB34, member RAS oncogene family	100144491	2.05366	0.000157915	0.00518936
15268477	AK236547	RABGEF1	RAB guanine nucleotide exchange factor (GEF) 1	100516668	-1.50143	0.000251854	0.00681955
15241938	AB090163	RAMP1	receptor (G protein-coupled) activity modifying protein 1	397401	-1.66674	0.000158665	0.00518936
15316578	XM_003128446	RASGRF1	Ras protein-specific guanine nucleotide-releasing factor 1	100157221	1.68285	2.54616e-05	0.00185302
15260400	XM_003122393	RASSF7	Ras association (RalGDS/AF-6) domain family (N-terminal) member 7	100512884	-2.00914	1.07212e-05	0.001141
15323470	XM_003356986	RBM46	RNA binding motif protein 46	100513804	1.89863	8.06793e-07	0.000540567
15214163	XM_005657053	RNF222	ring finger protein 222	100621152	-1.50831	1.05747e-05	0.001141
15286845	XM_003125906	RPAP2	RNA polymerase II associated protein 2	100517893	1.83302	0.000145358	0.00495763
15196726	BK001792	RTN1	reticulon 1	100152394	1.939	1.88638e-05	0.00158496
15316928	AK344377	SCAPER	S-phase cyclin A-associated protein in the ER	100154669	2.73419	0.000223092	0.00626611
15225708	XM_005654120	SCARF2	scavenger receptor class F, member 2	100155943	1.76537	3.91697e-06	0.000759234
15321971	ABY57914	SCD5	stearoyl-CoA desaturase 5	100135661	-3.04071	0.000298569	0.00762918
15254062	XM_003122558	SCYL1	SCY1-like 1 (S. cerevisiae)	100517698	2.19427	0.00033233	0.00811151
15246409	AK349737	SDCBP2	syndecan binding protein (syntenin) 2	100513633	1.86402	1.16827e-05	0.00120375
15226788	AK230607	SEC24C	SEC24 family, member C (S. cerevisiae)	100152996	2.05406	2.73532e-06	0.000685996
15215583	XM_001927855	SEMA3B	sema domain, immunoglobulin domain (Ig), short basic domain, secreted, (semaphorin) 3B	100153200	-2.06562	2.14719e-06	0.000616615
15243653	XM_003483864	SEMA5A	sema domain, seven thrombospondin repeats (type 1 and type 1-like), transmembrane domain (TM) and short cytoplasmic domain, (semaphorin) 5A	100516117	2.46034	1.24201e-07	0.000475744
15203312	ACN54196	SGCG	sarcoglycan, gamma (35kDa dystrophin-associated glycoprotein)	100272144	1.50211	3.22601e-05	0.00211223
15268723	AK343493	SH2B1	SH2B adaptor protein 1	100516788	1.70767	0.000313079	0.00784782
15212905	AK231357	SLC13A2	solute carrier family 13 (sodium-dependent dicarboxylate transporter), member 2	100512737	1.80733	5.22873e-05	0.00281992
15185208	XM_003121413	SLC14A2	solute carrier family 14 (urea transporter), member 2	100517692	1.91799	4.4942e-06	0.000774195
15255052	AK390012	SLC1A2	solute carrier family 1 (glial high affinity glutamate transporter), member 2	100627068	1.53072	0.000157408	0.00518936
15216974	AK230755	SLC25A36	solute carrier family 25 (pyrimidine nucleotide carrier ), member 36	100513238	2.28866	2.38729e-07	0.000514926
15264090	AK231119	SLC44A2	solute carrier family 44 (choline transporter), member 2	100524730	1.5595	0.000101116	0.00408155
15236287	XM_005671887	SLC4A10	solute carrier family 4, sodium bicarbonate transporter, member 10	100512016	1.55649	8.575e-06	0.00102453
15282565	AAM95457	SLC52A2	solute carrier family 52, riboflavin transporter, member 2	445519	2.00206	0.000158807	0.00518936
15273667	ACN76700	SLC5A2	solute carrier family 5 (sodium/glucose cotransporter), member 2	100286743	1.75725	7.05247e-05	0.00335112
15270186	AK236291	SNRNP200	small nuclear ribonucleoprotein 200kDa (U5)	100739577	-1.69835	3.49057e-06	0.000759082
15220340	ABY61324	SPCS1	signal peptidase complex subunit 1 homolog (S. cerevisiae)	100135675	1.81689	5.24763e-07	0.000540567
15185449	AK236661	SPG21	spastic paraplegia 21 (autosomal recessive, Mast syndrome)	100514084	1.96906	5.1671e-05	0.00279437
15324478	AB530168	SPP1	secreted phosphoprotein 1	397087	1.60112	0.000427608	0.00951277
15213761	AAG31753	SR-PSOX	scavenger receptor for phosphatidylserine and oxidized low density lipoprotein	396735	1.65098	4.62538e-06	0.000774195
15259681	AAQ56214	SVCT1	sodium-dependent vitamin C transporter 1	396578	2.007	0.000190652	0.00567234
15309066	XM_003128342	SYNGAP1	synaptic Ras GTPase activating protein 1	100525524	2.2381	5.259e-07	0.000540567
15315205	ABB29448	TAP1	transporter 1, ATP-binding cassette, sub-family B (MDR/TAP)	733649	1.7973	4.32154e-06	0.000774195
15231280	AK348992	TBC1D10A	TBC1 domain family, member 10A	100156070	1.99404	0.000278406	0.00730609
15260724	XM_003122464	TBC1D10C	TBC1 domain family, member 10C	100512518	-1.94482	1.61324e-05	0.00144935
15259927	XM_003354339	TCERG1	transcription elongation regulator 1	100621703	1.5694	9.18769e-06	0.00106619
15206098	AAF17355	TIMP2	TIMP metallopeptidase inhibitor 2	396988	2.26995	4.72377e-06	0.000774195
15250863	XM_003134723	TMEM229A	transmembrane protein 229A	100524656	1.55799	8.08049e-05	0.00362825
15204568	XM_005653841	TMEM255B	transmembrane protein 255B	100738464	2.08793	1.37927e-06	0.000568185
15312111	AK238313	TMEM55B	transmembrane protein 55B	100155939	2.23485	1.8243e-06	0.000615765
15243634	ACX35432	TNIP1	TNFAIP3 interacting protein 1	100271903	2.46034	1.24201e-07	0.000475744
15315861	AK236921	TREML1	triggering receptor expressed on myeloid cells-like 1	100154756	1.81072	3.70489e-05	0.00237028
15314636	BAD83393	TRIM39	tripartite motif containing 39	100151742	1.80577	3.83351e-06	0.000759082
15262423	XM_003122865	TRIM44	tripartite motif containing 44	100524974	-1.68323	5.81644e-06	0.000848406
15222568	XM_003132700	TRMT10C	tRNA methyltransferase 10 homolog C (S. cerevisiae)	100522163	1.95134	1.59403e-05	0.00144935
15204972	ACN11550	TRPC4	transient receptor potential cation channel, subfamily C, member 4	100157635	1.97115	4.37675e-06	0.000774195
15316954	AK232418	TSPAN3	tetraspanin 3	100157865	2.06368	1.71774e-06	0.00061256
15260329	XM_003122396	TSPAN4	tetraspanin 4	100513456	1.65349	9.46044e-05	0.00393871
15270404	XM_003124892	TXNDC9	thioredoxin domain containing 9	100520954	-2.92676	1.30192e-06	0.000568185
15284482	AK346399	UAP1	UDP-N-acteylglucosamine pyrophosphorylase 1	100156649	1.99493	1.39549e-06	0.000568185
15263435	XM_003123069	UBXN6	UBX domain protein 6	100524481	1.80897	5.86691e-05	0.00299886
15247724	A5GFS8	VAPB	VAMP (vesicle-associated membrane protein)-associated protein B and C	100144536	-2.19815	9.32685e-06	0.00106619
15183873	AK232168	VNN3	vanin 3	100152784	2.0207	1.21666e-06	0.000568185
15326410	AK231113	VWA5A	von Willebrand factor A domain containing 5A	100515913	1.61083	0.0003573	0.00850958
15268346	XM_003124410	WBSCR22	Williams Beuren syndrome chromosome region 22	100525688	2.19475	0.000354241	0.0084573
15292986	XM_003481651	WIF1	WNT inhibitory factor 1	100511326	1.58468	0.000207472	0.00601731
15216988	ADC38889	ZBTB38	zinc finger and BTB domain containing 38	100337656	1.57765	0.000185685	0.00562193
15247400	AK343244	ZNF335	zinc finger protein 335	100516768	-1.69012	0.000103475	0.00410662
15297229	XM_003127188	ZNF575	zinc finger protein 575	100519430	-2.301	3.80567e-05	0.00238031
15266482	XM_003480903	ZNF608	zinc finger protein 608	100512589	1.72159	9.84021e-05	0.00405562
15184206	AK239074	ZUFSP	zinc finger with UFM1-specific peptidase domain	100156556	1.89714	2.33524e-06	0.000634959
